# Supplementary material
Source: MDPI journal article supplement (https://www.mdpi.com/2073-4395/13/9/2189)
Supplement: s1 [file s1]

***Uncaria tomentosa*-loaded chitosan oligomers–hydroxyapatite–carbon nitride nanocarriers for postharvest fruit protection**

A. Santiago-Aliste, E. Sánchez-Hernández, L. Buzón-Durán, J. L. Marcos-Robles, J. Martín-Gil, and P. Martín-Ramos

SUPPORTING INFORMATION

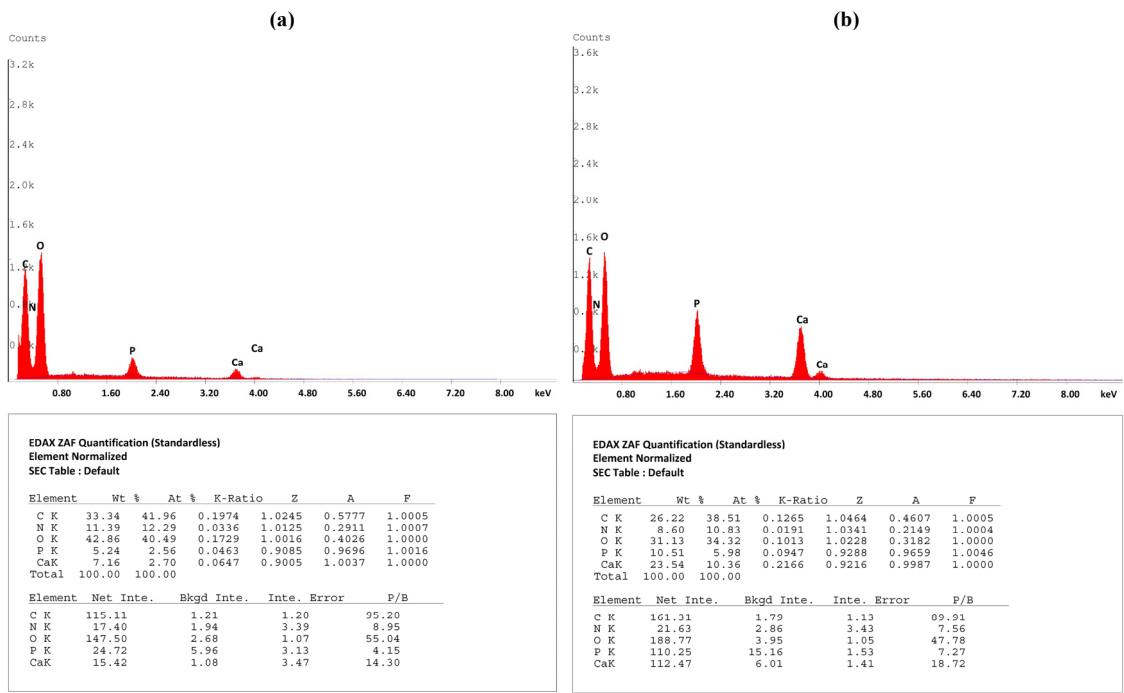

**Figure S1.** EDS multi-elemental characterization of the (a) empty nanocarriers and (b) nanocarriers loaded with *U. tomentosa* extract.

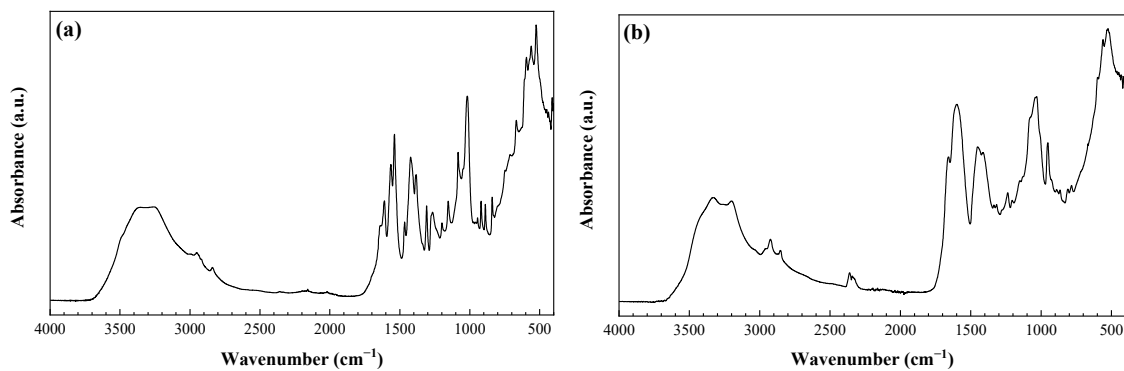

**Figure S2.** ATR-FTIR spectra of the (a) empty nanocarriers and (b) nanocarriers loaded with *U. tomentosa* extract.

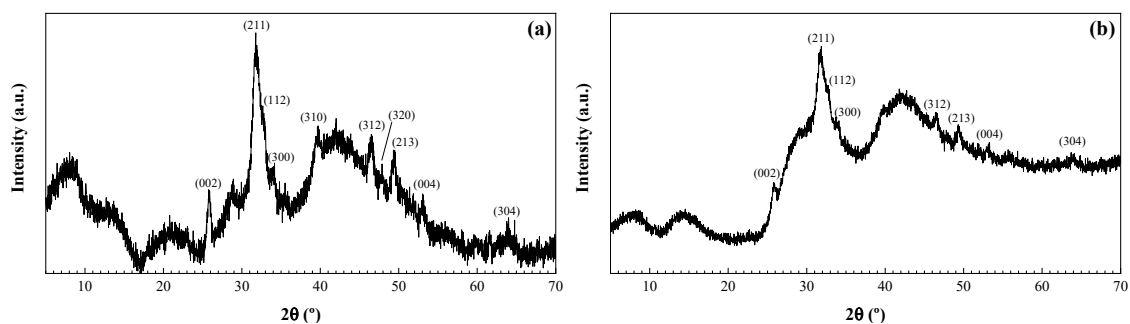

**Figure S3.** X-ray powder diffraction pattern of the (a) empty nanocarriers and (b) nanocarriers loaded with *U. tomentosa* extract.

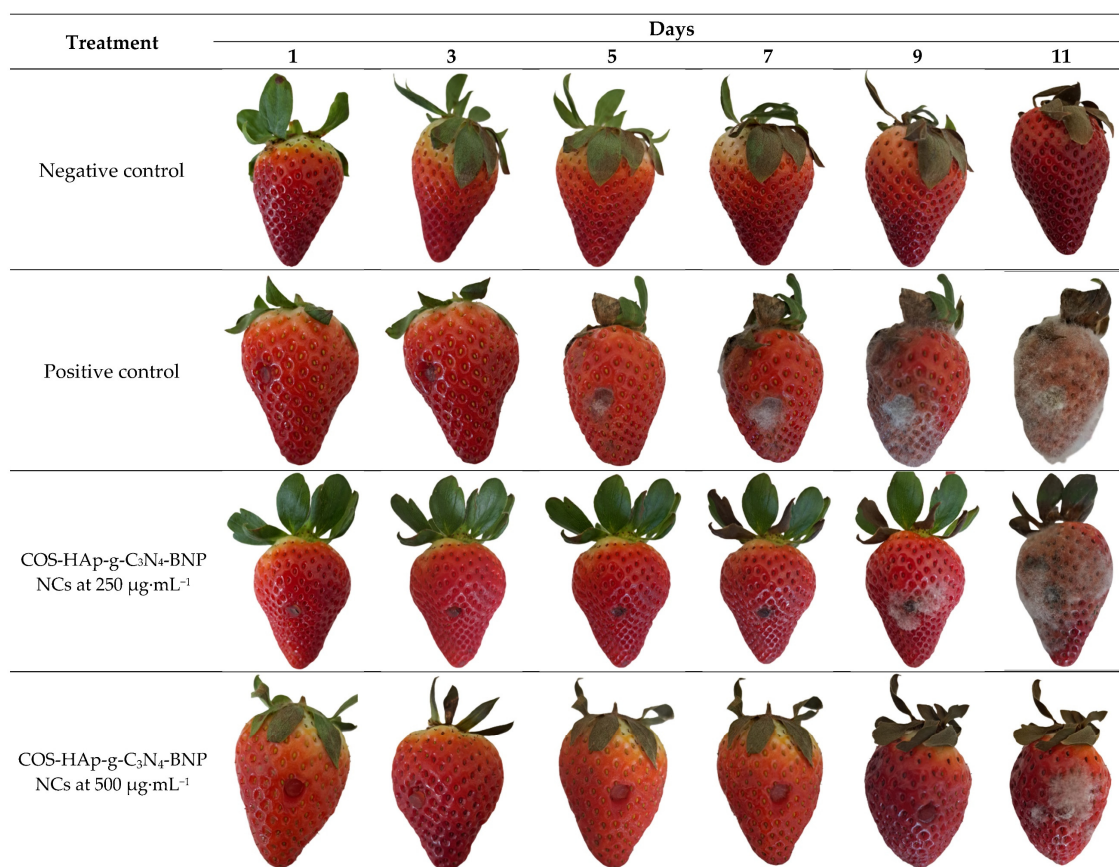

**Figure S4.** External lesions caused by *B. cinerea* on strawberries cv. “Fortuna” eleven days after artificial inoculation in the presence/absence of the NC-based treatment: (a) negative control; (b) fruits artificially inoculated with *B. cinerea* (positive control); (c) fruits treated with the COS-HAp-g-C<sub>3</sub>N<sub>4</sub> NCs loaded with the BNP at 250  $\mu\text{g}\cdot\text{mL}^{-1}$ ; (d) fruits treated with the COS-HAp-g-C<sub>3</sub>N<sub>4</sub> NCs loaded with the BNP at 500  $\mu\text{g}\cdot\text{mL}^{-1}$ . Only one replicate per treatment is shown.

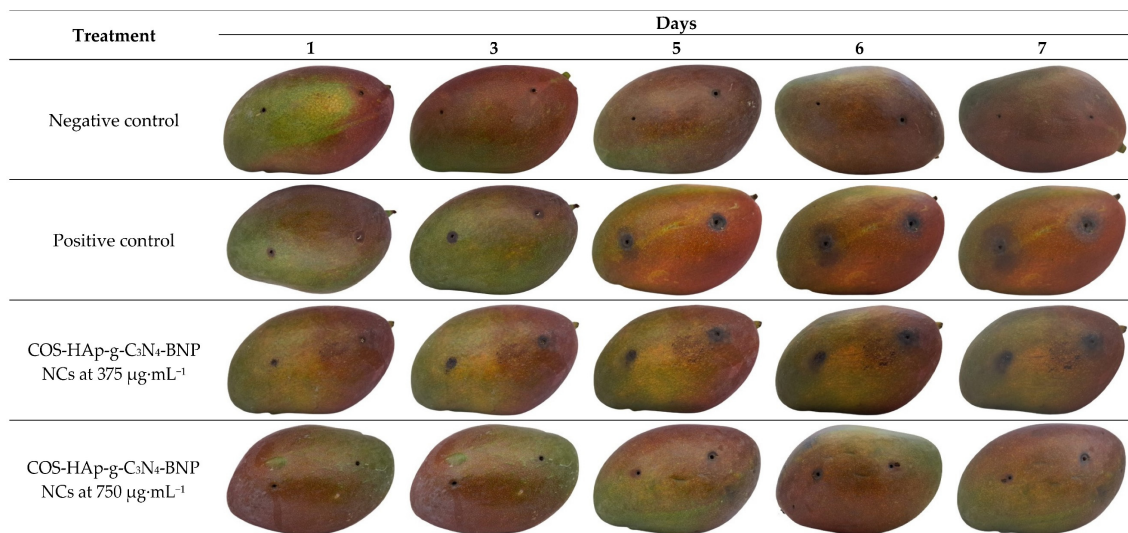

**Figure S5.** External lesions caused by *C. gloeosporioides* on mangoes cv. “Keitt” seven days after artificial inoculation in the presence/absence of the NC-based treatment: (a) negative control; (b) fruits artificially inoculated with *C. gloeosporioides* (positive control); (c) fruits treated with the COS-HAp-g-C<sub>3</sub>N<sub>4</sub> NCs loaded with the BNP at 375  $\mu\text{g}\cdot\text{mL}^{-1}$ ; (d) fruits treated with the COS-HAp-g-C<sub>3</sub>N<sub>4</sub> NCs loaded with the BNP at 750  $\mu\text{g}\cdot\text{mL}^{-1}$ . Only one replicate per treatment is shown.

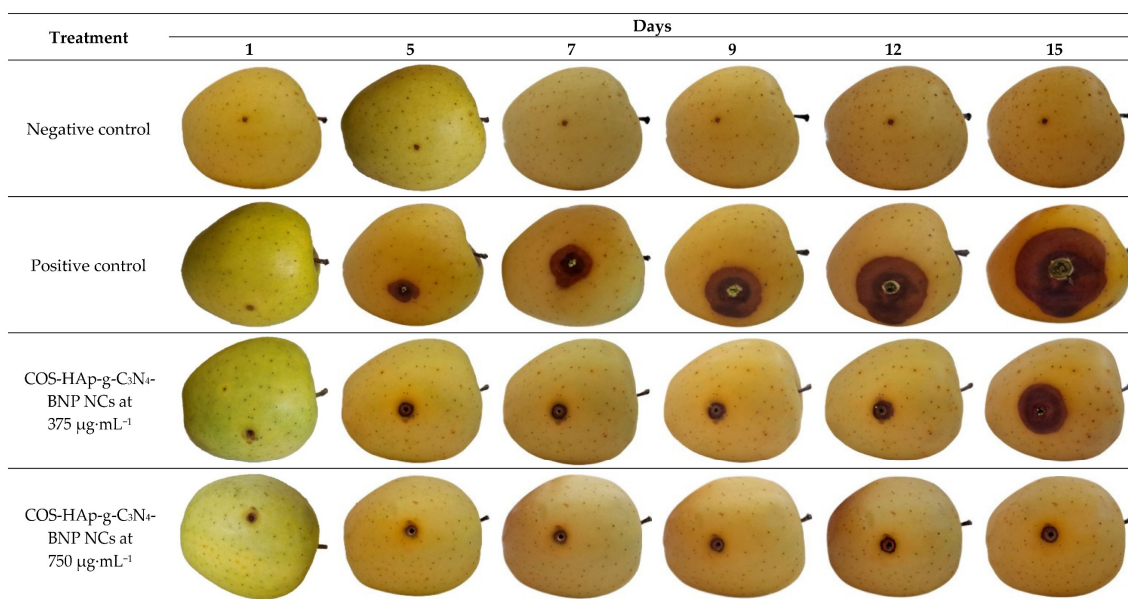

**Figure S6.** External lesions caused by *P. expansum* on apples cv. “Golden Delicious” fifteen days after artificial inoculation in the presence/absence of the NC-based treatment: (a) negative control; (b) fruits artificially inoculated with *P. expansum* (positive control); (c) fruits treated with the COS-HAp-g-C<sub>3</sub>N<sub>4</sub> NCs loaded with the BNP at 375  $\mu\text{g}\cdot\text{mL}^{-1}$ ; (d) fruits treated with the COS-HAp-g-C<sub>3</sub>N<sub>4</sub> NCs loaded with the BNP at 750  $\mu\text{g}\cdot\text{mL}^{-1}$ . Only one replicate per treatment is shown.



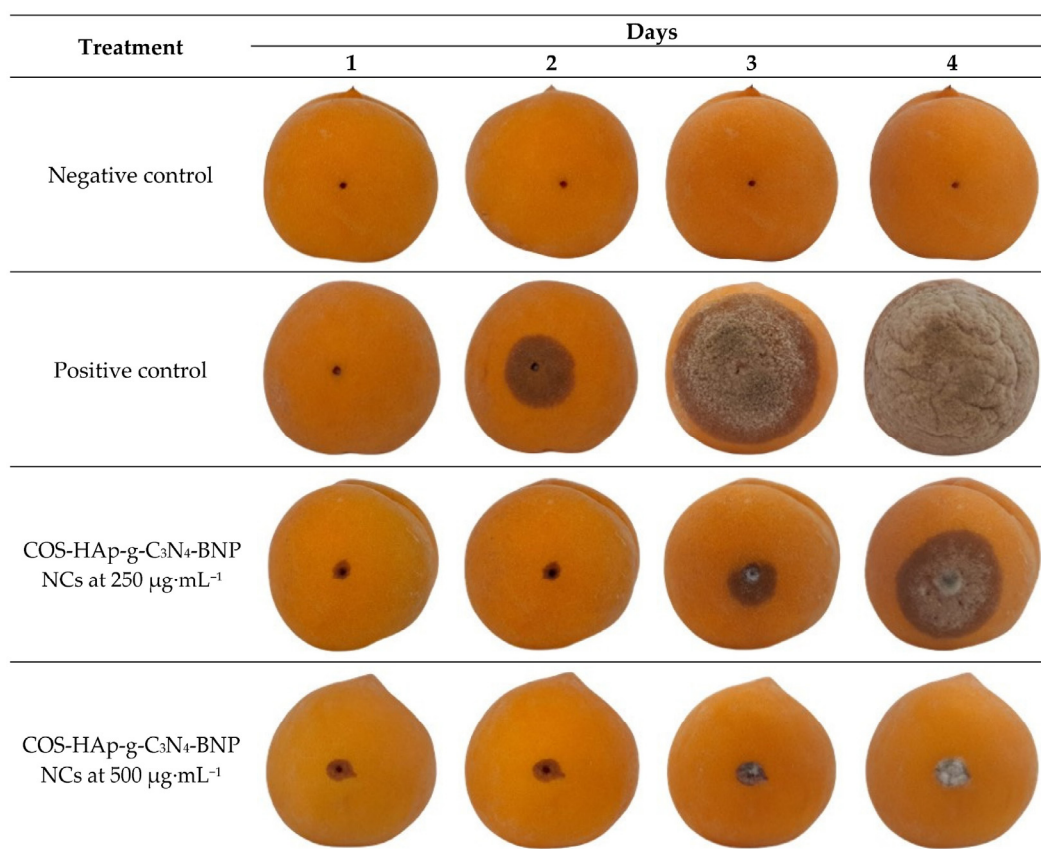

**Figure S7.** External lesions caused by *M. laxa* on peaches cv. “Summer sun” four days after artificial inoculation in the presence/absence of the NC-based treatment: (a) negative control; (b) fruits artificially inoculated with *M. laxa* (positive control); (c) fruits treated with the COS-HAp-g-C<sub>3</sub>N<sub>4</sub> NCs loaded with the BNP at 250  $\mu\text{g}\cdot\text{mL}^{-1}$ ; (d) fruits treated with the COS-HAp-g-C<sub>3</sub>N<sub>4</sub> NCs loaded with the BNP at 500  $\mu\text{g}\cdot\text{mL}^{-1}$ . Only one replicate per treatment is shown.

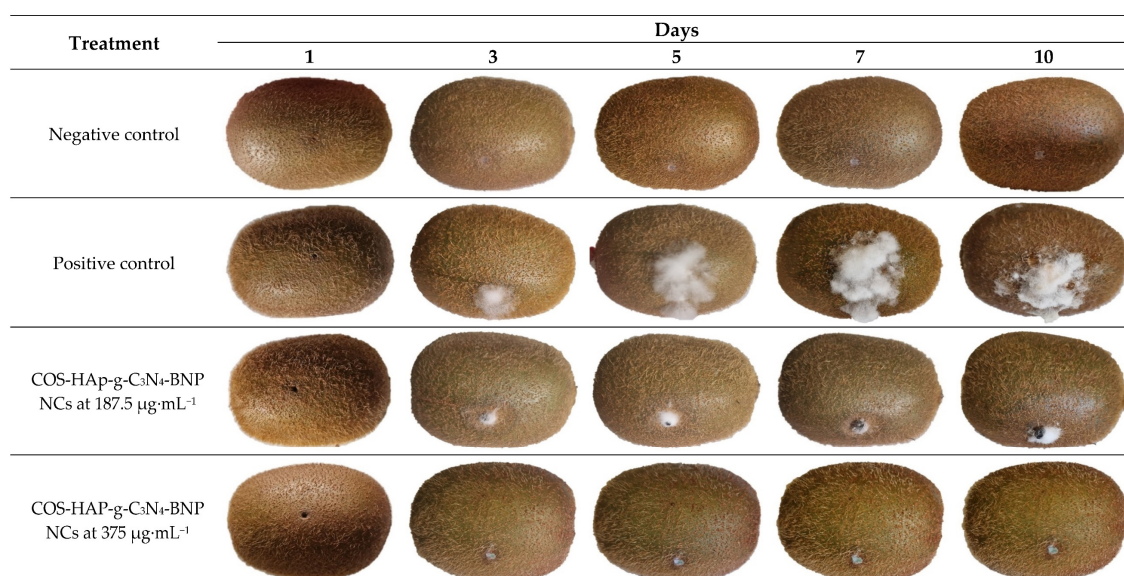

**Figure S8.** External lesions caused by *S. sclerotiorum* on kiwifruit cv. “Hayward Green” ten days after artificial inoculation in the presence/absence of the NC-based treatment: (a) negative control; (b) fruits artificially inoculated with *S. sclerotiorum* (positive control); (c) fruits treated with the COS-HAp-g-C<sub>3</sub>N<sub>4</sub> NCs loaded with the BNP at 187.5  $\mu\text{g}\cdot\text{mL}^{-1}$ ; (d) fruits treated with the COS-HAp-g-C<sub>3</sub>N<sub>4</sub> NCs loaded with the BNP at 375  $\mu\text{g}\cdot\text{mL}^{-1}$ . Only one replicate per treatment is shown.

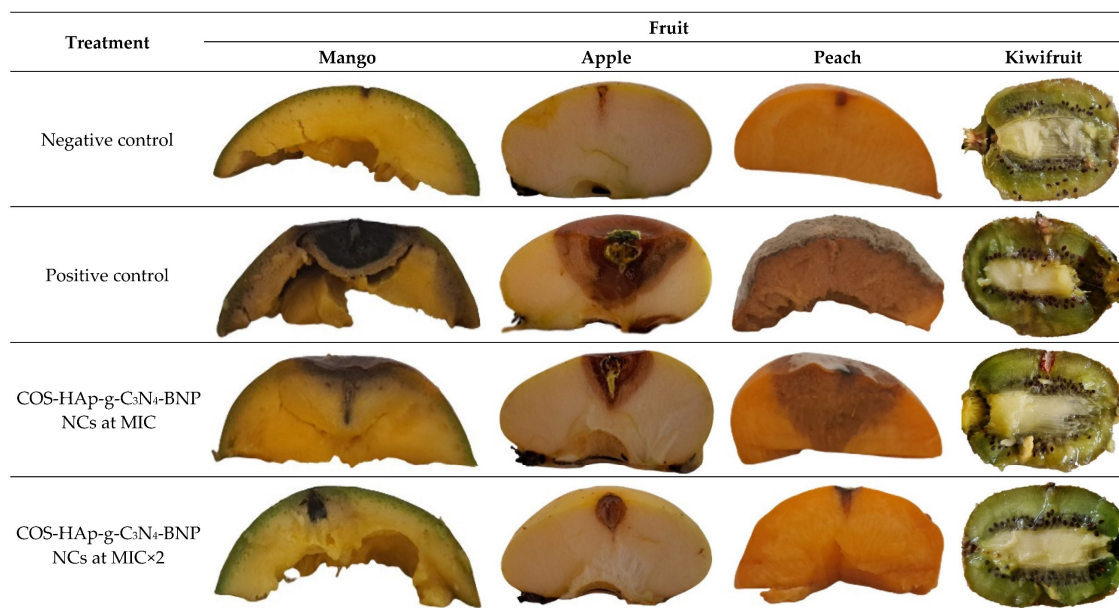

**Figure S9.** Internal lesions caused by *C. gloeosporioides* on mangoes, *P. expansum* on apples, *M. laxa* on peaches, and *S. sclerotiorum* on kiwifruit in the presence/absence of the NC-based treatment. Only one replicate per treatment is shown.

**Table S1.** Results of the normality and homoscedasticity tests, along with those of Kruskal-Wallis test, for the mycelial growth inhibition data presented in Figure 2 of the main document.

|                                                                                                          | <i>B. cinerea</i> | <i>C. gloeosporioides</i> | <i>P. expansum</i> | <i>M. laxa</i> | <i>S. sclerotiorum</i> |
|----------------------------------------------------------------------------------------------------------|-------------------|---------------------------|--------------------|----------------|------------------------|
| Test on the normality of the residues<br>(p-value, two-tailed) *                                         | <0.0001           | <0.0001                   | <0.0001            | <0.0001        | <0.0001                |
| Test for homoscedasticity of the residuals,<br>treatment*concentration factor<br>(p-value, two-tailed) * | <0.0001           | <0.0001                   | <0.0001            | <0.0001        | <0.0001                |
| Kruskal-Wallis test (p-value, one-tailed)                                                                | <0.0001           | <0.0001                   | <0.0001            | <0.0001        | <0.0001                |

Since the computed p-values are lower than the significance level  $\alpha = 0.05$ , one can reject the null hypothesis (i.e., that the residuals follow a Normal distribution in the case of the Shapiro-Wilk test and that the residuals are homoscedastic in the case of Levene test)

**Table S2.** Results of the ANOVA, normality, and homoscedasticity tests for the lesion size data presented in Table 4 of the main document.

|                                                                       | Strawberry | Mango   | Apple   | Peach   | Kiwifruit |
|-----------------------------------------------------------------------|------------|---------|---------|---------|-----------|
| Analysis of variance (Pr > F)                                         | <0.0001    | <0.0001 | <0.0001 | <0.0001 | <0.0001   |
| Test on the normality of the residues<br>(p-value, two-tailed) *      | 0.365      | 0.371   | 0.294   | 0.386   | 0.136     |
| Test for homoscedasticity of the residuals<br>(p-value, two-tailed) * | 0.212      | 0.217   | 0.274   | 0.228   | 0.115     |

Since the computed p-values are greater than the significance level  $\alpha = 0.05$ , one cannot reject the null hypothesis (i.e., that the residuals follow a Normal distribution in the case of the Shapiro-Wilk test and that the residuals are homoscedastic in the case of Levene test)

**Table S3.** Kruskal-Wallis test and multiple pairwise comparisons using the Conover-Iman procedure for *B. cinerea* mycelial growth inhibition values.

| Treatment Concentration                            | Mean of ranks | Groups |   |
|----------------------------------------------------|---------------|--------|---|
| COS-HAp-g-C <sub>3</sub> N <sub>4</sub>  1000      | 23.000        | A      |   |
| COS-HAp-g-C <sub>3</sub> N <sub>4</sub>  1500      | 23.000        | A      |   |
| COS-HAp-g-C <sub>3</sub> N <sub>4</sub>  500       | 23.000        | A      |   |
| COS-HAp-g-C <sub>3</sub> N <sub>4</sub>  750       | 23.000        | A      |   |
| COS-HAp-g-C <sub>3</sub> N <sub>4</sub> -BNP 1000  | 23.000        | A      |   |
| COS-HAp-g-C <sub>3</sub> N <sub>4</sub> -BNP 1500  | 23.000        | A      |   |
| COS-HAp-g-C <sub>3</sub> N <sub>4</sub> -BNP 250   | 23.000        | A      |   |
| COS-HAp-g-C <sub>3</sub> N <sub>4</sub> -BNP 375   | 23.000        | A      |   |
| COS-HAp-g-C <sub>3</sub> N <sub>4</sub> -BNP 500   | 23.000        | A      |   |
| COS-HAp-g-C <sub>3</sub> N <sub>4</sub> -BNP 750   | 23.000        | A      |   |
| <i>U. tomentosa</i>  1000                          | 23.000        | A      |   |
| <i>U. tomentosa</i>  1500                          | 23.000        | A      |   |
| <i>U. tomentosa</i>  375                           | 23.000        | A      |   |
| <i>U. tomentosa</i>  500                           | 23.000        | A      |   |
| <i>U. tomentosa</i>  750                           | 23.000        | A      |   |
| COS-HAp-g-C <sub>3</sub> N <sub>4</sub> -BNP 187.5 | 47.000        | B      |   |
| <i>U. tomentosa</i>  250                           | 50.000        | C      |   |
| <i>U. tomentosa</i>  187.5                         | 53.000        | D      |   |
| <i>U. tomentosa</i>  125                           | 56.000        | E      |   |
| <i>U. tomentosa</i>  93.75                         | 59.167        | F      |   |
| COS-HAp-g-C <sub>3</sub> N <sub>4</sub>  375       | 61.833        | G      |   |
| COS-HAp-g-C <sub>3</sub> N <sub>4</sub> -BNP 125   | 65.000        | H      |   |
| <i>U. tomentosa</i>  62.5                          | 68.000        | I      |   |
| COS-HAp-g-C <sub>3</sub> N <sub>4</sub>  250       | 71.000        | J      |   |
| COS-HAp-g-C <sub>3</sub> N <sub>4</sub> -BNP 93.75 | 74.000        | K      |   |
| COS-HAp-g-C <sub>3</sub> N <sub>4</sub> -BNP 62.5  | 77.000        | L      |   |
| COS-HAp-g-C <sub>3</sub> N <sub>4</sub>  125       | 86.000        |        | M |
| COS-HAp-g-C <sub>3</sub> N <sub>4</sub>  187.5     | 86.000        |        | M |
| COS-HAp-g-C <sub>3</sub> N <sub>4</sub>  62.5      | 86.000        |        | M |
| COS-HAp-g-C <sub>3</sub> N <sub>4</sub>  93.75     | 86.000        |        | M |
| Control 0                                          | 86.000        |        | M |

Treatments/controls labeled with the same letters are not significantly different at  $p < 0.05$ .

**Table S4.** Kruskal-Wallis test and multiple pairwise comparisons using the Conover-Iman procedure for *C. gloeosporioides* mycelial growth inhibition values.

| Treatment Concentration                            | Mean of ranks | Groups |   |   |   |   |   |   |   |   |   |   |
|----------------------------------------------------|---------------|--------|---|---|---|---|---|---|---|---|---|---|
| COS-HAp-g-C <sub>3</sub> N <sub>4</sub>  1000      | 17.000        | A      |   |   |   |   |   |   |   |   |   |   |
| COS-HAp-g-C <sub>3</sub> N <sub>4</sub>  1500      | 17.000        | A      |   |   |   |   |   |   |   |   |   |   |
| COS-HAp-g-C <sub>3</sub> N <sub>4</sub>  500       | 17.000        | A      |   |   |   |   |   |   |   |   |   |   |
| COS-HAp-g-C <sub>3</sub> N <sub>4</sub>  750       | 17.000        | A      |   |   |   |   |   |   |   |   |   |   |
| COS-HAp-g-C <sub>3</sub> N <sub>4</sub> -BNP 1000  | 17.000        | A      |   |   |   |   |   |   |   |   |   |   |
| COS-HAp-g-C <sub>3</sub> N <sub>4</sub> -BNP 1500  | 17.000        | A      |   |   |   |   |   |   |   |   |   |   |
| COS-HAp-g-C <sub>3</sub> N <sub>4</sub> -BNP 375   | 17.000        | A      |   |   |   |   |   |   |   |   |   |   |
| COS-HAp-g-C <sub>3</sub> N <sub>4</sub> -BNP 500   | 17.000        | A      |   |   |   |   |   |   |   |   |   |   |
| COS-HAp-g-C <sub>3</sub> N <sub>4</sub> -BNP 750   | 17.000        | A      |   |   |   |   |   |   |   |   |   |   |
| <i>U. tomentosa</i>  1000                          | 17.000        | A      |   |   |   |   |   |   |   |   |   |   |
| <i>U. tomentosa</i>  1500                          | 17.000        | A      |   |   |   |   |   |   |   |   |   |   |
| COS-HAp-g-C <sub>3</sub> N <sub>4</sub>  375       | 35.000        |        | B |   |   |   |   |   |   |   |   |   |
| COS-HAp-g-C <sub>3</sub> N <sub>4</sub> -BNP 250   | 38.000        |        | B | C |   |   |   |   |   |   |   |   |
| <i>U. tomentosa</i>  750                           | 41.000        |        |   | C | D |   |   |   |   |   |   |   |
| COS-HAp-g-C <sub>3</sub> N <sub>4</sub> -BNP 187.5 | 44.000        |        |   |   | D | E |   |   |   |   |   |   |
| <i>U. tomentosa</i>  500                           | 47.167        |        |   |   |   | E | F |   |   |   |   |   |
| COS-HAp-g-C <sub>3</sub> N <sub>4</sub>  250       | 49.833        |        |   |   |   |   | F | G |   |   |   |   |
| COS-HAp-g-C <sub>3</sub> N <sub>4</sub>  187.5     | 54.833        |        |   |   |   |   |   | G | H |   |   |   |
| <i>U. tomentosa</i>  375                           | 54.833        |        |   |   |   |   |   | G | H |   |   |   |
| COS-HAp-g-C <sub>3</sub> N <sub>4</sub> -BNP 125   | 59.333        |        |   |   |   |   |   |   | H | I |   |   |
| COS-HAp-g-C <sub>3</sub> N <sub>4</sub>  125       | 63.167        |        |   |   |   |   |   |   |   | I | J |   |
| <i>U. tomentosa</i>  250                           | 64.333        |        |   |   |   |   |   |   |   | I | J |   |
| COS-HAp-g-C <sub>3</sub> N <sub>4</sub> -BNP 93.75 | 68.333        |        |   |   |   |   |   |   |   |   | J | K |
| <i>U. tomentosa</i>  125                           | 71.167        |        |   |   |   |   |   |   |   |   |   | K |
| <i>U. tomentosa</i>  187.5                         | 72.000        |        |   |   |   |   |   |   |   |   |   | K |
| COS-HAp-g-C <sub>3</sub> N <sub>4</sub>  62.5      | 84.500        |        |   |   |   |   |   |   |   |   |   | L |
| COS-HAp-g-C <sub>3</sub> N <sub>4</sub>  93.75     | 84.500        |        |   |   |   |   |   |   |   |   |   | L |
| COS-HAp-g-C <sub>3</sub> N <sub>4</sub> -BNP 62.5  | 84.500        |        |   |   |   |   |   |   |   |   |   | L |
| Control 0                                          | 84.500        |        |   |   |   |   |   |   |   |   |   | L |
| <i>U. tomentosa</i>  62.5                          | 84.500        |        |   |   |   |   |   |   |   |   |   | L |
| <i>U. tomentosa</i>  93.75                         | 84.500        |        |   |   |   |   |   |   |   |   |   | L |

Treatments/controls labeled with the same letters are not significantly different at  $p < 0.05$ .

**Table S5.** Kruskal-Wallis test and multiple pairwise comparisons using the Conover-Iman procedure for *M. laxa* mycelial growth inhibition values.

| Treatment Concentration                            | Mean of ranks | Groups |   |   |   |   |   |   |   |   |   |
|----------------------------------------------------|---------------|--------|---|---|---|---|---|---|---|---|---|
| COS-HAp-g-C <sub>3</sub> N <sub>4</sub>  1000      | 15.500        | A      |   |   |   |   |   |   |   |   |   |
| COS-HAp-g-C <sub>3</sub> N <sub>4</sub>  1500      | 15.500        | A      |   |   |   |   |   |   |   |   |   |
| COS-HAp-g-C <sub>3</sub> N <sub>4</sub>  750       | 15.500        | A      |   |   |   |   |   |   |   |   |   |
| COS-HAp-g-C <sub>3</sub> N <sub>4</sub> -BNP 1000  | 15.500        | A      |   |   |   |   |   |   |   |   |   |
| COS-HAp-g-C <sub>3</sub> N <sub>4</sub> -BNP 1500  | 15.500        | A      |   |   |   |   |   |   |   |   |   |
| COS-HAp-g-C <sub>3</sub> N <sub>4</sub> -BNP 250   | 15.500        | A      |   |   |   |   |   |   |   |   |   |
| COS-HAp-g-C <sub>3</sub> N <sub>4</sub> -BNP 375   | 15.500        | A      |   |   |   |   |   |   |   |   |   |
| COS-HAp-g-C <sub>3</sub> N <sub>4</sub> -BNP 500   | 15.500        | A      |   |   |   |   |   |   |   |   |   |
| COS-HAp-g-C <sub>3</sub> N <sub>4</sub> -BNP 750   | 15.500        | A      |   |   |   |   |   |   |   |   |   |
| <i>U. tomentosa</i>  1500                          | 15.500        | A      |   |   |   |   |   |   |   |   |   |
| COS-HAp-g-C <sub>3</sub> N <sub>4</sub>  500       | 32.333        |        | B |   |   |   |   |   |   |   |   |
| <i>U. tomentosa</i>  1000                          | 34.667        |        | B | C |   |   |   |   |   |   |   |
| <i>U. tomentosa</i>  750                           | 38.333        |        |   | C | D |   |   |   |   |   |   |
| COS-HAp-g-C <sub>3</sub> N <sub>4</sub> -BNP 187.5 | 41.000        |        |   |   | D | E |   |   |   |   |   |
| COS-HAp-g-C <sub>3</sub> N <sub>4</sub>  375       | 43.833        |        |   |   | D | E |   |   |   |   |   |
| COS-HAp-g-C <sub>3</sub> N <sub>4</sub> -BNP 125   | 46.833        |        |   |   |   | E | F |   |   |   |   |
| <i>U. tomentosa</i>  500                           | 50.000        |        |   |   |   |   | F | G |   |   |   |
| COS-HAp-g-C <sub>3</sub> N <sub>4</sub>  250       | 53.000        |        |   |   |   |   |   | G | H |   |   |
| <i>U. tomentosa</i>  375                           | 56.000        |        |   |   |   |   |   |   | H | I |   |
| COS-HAp-g-C <sub>3</sub> N <sub>4</sub>  187.5     | 59.667        |        |   |   |   |   |   |   |   | I | J |
| COS-HAp-g-C <sub>3</sub> N <sub>4</sub> -BNP 93.75 | 65.167        |        |   |   |   |   |   |   |   |   | J |
| <i>U. tomentosa</i>  250                           | 65.167        |        |   |   |   |   |   |   |   |   | K |
| COS-HAp-g-C <sub>3</sub> N <sub>4</sub>  125       | 69.667        |        |   |   |   |   |   |   |   |   | K |
| COS-HAp-g-C <sub>3</sub> N <sub>4</sub> -BNP 62.5  | 69.667        |        |   |   |   |   |   |   |   |   | K |
| <i>U. tomentosa</i>  187.5                         | 69.667        |        |   |   |   |   |   |   |   |   | K |
| <i>U. tomentosa</i>  125                           | 77.000        |        |   |   |   |   |   |   |   |   | L |
| COS-HAp-g-C <sub>3</sub> N <sub>4</sub>  62.5      | 86.000        |        |   |   |   |   |   |   |   |   | M |
| COS-HAp-g-C <sub>3</sub> N <sub>4</sub>  93.75     | 86.000        |        |   |   |   |   |   |   |   |   | M |
| Control 0                                          | 86.000        |        |   |   |   |   |   |   |   |   | M |
| <i>U. tomentosa</i>  62.5                          | 86.000        |        |   |   |   |   |   |   |   |   | M |
| <i>U. tomentosa</i>  93.75                         | 86.000        |        |   |   |   |   |   |   |   |   | M |

Treatments/controls labeled with the same letters are not significantly different at  $p < 0.05$ .



**Table S6.** Kruskal-Wallis test and multiple pairwise comparisons using the Conover-Iman procedure for *P. expansum* mycelial growth inhibition values.

| Treatment Concentration                            | Mean of ranks | Groups |
|----------------------------------------------------|---------------|--------|
| COS-HAp-g-C <sub>3</sub> N <sub>4</sub>  1000      | 12.500        | A      |
| COS-HAp-g-C <sub>3</sub> N <sub>4</sub>  1500      | 12.500        | A      |
| COS-HAp-g-C <sub>3</sub> N <sub>4</sub> -BNP 1000  | 12.500        | A      |
| COS-HAp-g-C <sub>3</sub> N <sub>4</sub> -BNP 1500  | 12.500        | A      |
| COS-HAp-g-C <sub>3</sub> N <sub>4</sub> -BNP 375   | 12.500        | A      |
| COS-HAp-g-C <sub>3</sub> N <sub>4</sub> -BNP 500   | 12.500        | A      |
| COS-HAp-g-C <sub>3</sub> N <sub>4</sub> -BNP 750   | 12.500        | A      |
| <i>U. tomentosa</i>  1500                          | 12.500        | A      |
| COS-HAp-g-C <sub>3</sub> N <sub>4</sub> -BNP 250   | 26.000        | B      |
| <i>U. tomentosa</i>  1000                          | 29.667        | B C    |
| COS-HAp-g-C <sub>3</sub> N <sub>4</sub>  750       | 31.667        | B C    |
| <i>U. tomentosa</i>  750                           | 36.667        | B C D  |
| <i>U. tomentosa</i>  500                           | 38.500        | C D    |
| COS-HAp-g-C <sub>3</sub> N <sub>4</sub>  500       | 39.833        | C D E  |
| COS-HAp-g-C <sub>3</sub> N <sub>4</sub>  375       | 47.000        | D E F  |
| <i>U. tomentosa</i>  375                           | 47.000        | D E F  |
| COS-HAp-g-C <sub>3</sub> N <sub>4</sub> -BNP 187.5 | 50.667        | E F G  |
| COS-HAp-g-C <sub>3</sub> N <sub>4</sub>  250       | 51.167        | F G    |
| COS-HAp-g-C <sub>3</sub> N <sub>4</sub>  187.5     | 56.167        | F G H  |
| <i>U. tomentosa</i>  250                           | 57.333        | F G H  |
| <i>U. tomentosa</i>  187.5                         | 60.667        | G H    |
| <i>U. tomentosa</i>  125                           | 66.000        | H I    |
| COS-HAp-g-C <sub>3</sub> N <sub>4</sub>  125       | 67.000        | H I    |
| COS-HAp-g-C <sub>3</sub> N <sub>4</sub>  93.75     | 74.333        | I J    |
| COS-HAp-g-C <sub>3</sub> N <sub>4</sub> -BNP 125   | 79.333        | J      |
| COS-HAp-g-C <sub>3</sub> N <sub>4</sub>  62.5      | 83.000        | J      |
| COS-HAp-g-C <sub>3</sub> N <sub>4</sub> -BNP 62.5  | 83.000        | J      |
| COS-HAp-g-C <sub>3</sub> N <sub>4</sub> -BNP 93.75 | 83.000        | J      |
| Control 0                                          | 83.000        | J      |
| <i>U. tomentosa</i>  62.5                          | 83.000        | J      |
| <i>U. tomentosa</i>  93.75                         | 83.000        | J      |

Treatments/controls labeled with the same letters are not significantly different at  $p < 0.05$ .

**Table S7.** Kruskal-Wallis test and multiple pairwise comparisons using the Conover-Iman procedure for *S. sclerotiorum* mycelial growth inhibition values.

| Treatment concentration                            | Mean of ranks | Groups |   |   |   |
|----------------------------------------------------|---------------|--------|---|---|---|
| COS-HAp-g-C <sub>3</sub> N <sub>4</sub>  1000      | 23.000        | A      |   |   |   |
| COS-HAp-g-C <sub>3</sub> N <sub>4</sub>  1500      | 23.000        | A      |   |   |   |
| COS-HAp-g-C <sub>3</sub> N <sub>4</sub>  500       | 23.000        | A      |   |   |   |
| COS-HAp-g-C <sub>3</sub> N <sub>4</sub>  750       | 23.000        | A      |   |   |   |
| COS-HAp-g-C <sub>3</sub> N <sub>4</sub> -BNP 1000  | 23.000        | A      |   |   |   |
| COS-HAp-g-C <sub>3</sub> N <sub>4</sub> -BNP 1500  | 23.000        | A      |   |   |   |
| COS-HAp-g-C <sub>3</sub> N <sub>4</sub> -BNP 187.5 | 23.000        | A      |   |   |   |
| COS-HAp-g-C <sub>3</sub> N <sub>4</sub> -BNP 250   | 23.000        | A      |   |   |   |
| COS-HAp-g-C <sub>3</sub> N <sub>4</sub> -BNP 375   | 23.000        | A      |   |   |   |
| COS-HAp-g-C <sub>3</sub> N <sub>4</sub> -BNP 500   | 23.000        | A      |   |   |   |
| COS-HAp-g-C <sub>3</sub> N <sub>4</sub> -BNP 750   | 23.000        | A      |   |   |   |
| <i>U. tomentosa</i>  1000                          | 23.000        | A      |   |   |   |
| <i>U. tomentosa</i>  1500                          | 23.000        | A      |   |   |   |
| <i>U. tomentosa</i>  500                           | 23.000        | A      |   |   |   |
| <i>U. tomentosa</i>  750                           | 23.000        | A      |   |   |   |
| COS-HAp-g-C <sub>3</sub> N <sub>4</sub>  375       | 47.000        |        | B |   |   |
| <i>U. tomentosa</i>  375                           | 50.000        |        |   | C |   |
| COS-HAp-g-C <sub>3</sub> N <sub>4</sub> -BNP 125   | 53.000        |        |   |   | D |
| <i>U. tomentosa</i>  250                           | 56.000        |        |   |   | E |
| COS-HAp-g-C <sub>3</sub> N <sub>4</sub>  125       | 75.500        |        |   |   | F |
| COS-HAp-g-C <sub>3</sub> N <sub>4</sub>  187.5     | 75.500        |        |   |   | F |
| COS-HAp-g-C <sub>3</sub> N <sub>4</sub>  250       | 75.500        |        |   |   | F |
| COS-HAp-g-C <sub>3</sub> N <sub>4</sub>  62.5      | 75.500        |        |   |   | F |
| COS-HAp-g-C <sub>3</sub> N <sub>4</sub>  93.75     | 75.500        |        |   |   | F |
| COS-HAp-g-C <sub>3</sub> N <sub>4</sub> -BNP 62.5  | 75.500        |        |   |   | F |
| COS-HAp-g-C <sub>3</sub> N <sub>4</sub> -BNP 93.75 | 75.500        |        |   |   | F |
| Control 0                                          | 75.500        |        |   |   | F |
| <i>U. tomentosa</i>  125                           | 75.500        |        |   |   | F |
| <i>U. tomentosa</i>  187.5                         | 75.500        |        |   |   | F |
| <i>U. tomentosa</i>  62.5                          | 75.500        |        |   |   | F |
| <i>U. tomentosa</i>  93.75                         | 75.500        |        |   |   | F |

Treatments/controls labeled with the same letters are not significantly different at  $p < 0.05$ .

**Table S8.** Nanocarriers reported in the literature for the control of *Botrytis cinerea*, *Colletotrichum* spp., *Monilinia* spp., *Penicillium* spp., and *Sclerotinia sclerotiorum*.

| Phytopathogen | Type of Nanocarrier                                                                                     | Active Ingredient Encapsulated                                                      | Encapsulation Efficiency | Type of Bioassay               | Activity                                                                                                                                                                                                                                                                               | Ref. |
|---------------|---------------------------------------------------------------------------------------------------------|-------------------------------------------------------------------------------------|--------------------------|--------------------------------|----------------------------------------------------------------------------------------------------------------------------------------------------------------------------------------------------------------------------------------------------------------------------------------|------|
|               | Quaternary ammonium salt modified-mesoporous silica NPs modified with carboxylatopillar[5]arene capping | Berberine hydrochloride                                                             | n.a.                     | In vitro, ex-situ, and in vivo | In vitro: 36.20 and 48.36% at 60 and 120 $\mu\text{g}\cdot\text{mL}^{-1}$ , respectively. Ex-situ (detached tomato leaves): 45.47 and 52.71% at 60 and 120 $\mu\text{g}\cdot\text{mL}^{-1}$ , respectively, after 54 h. In vivo (potted tomato leaves): high inhibition.               | [1]  |
|               | Poly (lactic-co-glycolic acid) NPs                                                                      | Pterostilbene                                                                       | 37-75%                   | In vitro                       | In vitro: 25% at 20 $\mu\text{g}\cdot\text{mL}^{-1}$ after 72 h.                                                                                                                                                                                                                       | [2]  |
|               | $\beta$ -Glucans and/or soy lecithin                                                                    | Resveratrol                                                                         | 67-94%                   | In vitro                       | In vitro: 50-70% inhibition at 100 $\mu\text{g}\cdot\text{mL}^{-1}$                                                                                                                                                                                                                    | [3]  |
|               | $\beta$ -Cyclodextrin (CD) inclusion compounds dispersed in a low-density polyethylene (LDPE) film      | Carvacrol and trans-cinnamaldehyde                                                  | 61-92%                   | In vitro                       | In vitro: 31.4 and 10.9% fungicidal activity for LDPE doped with 1 wt% of $\beta$ -CD-carcacrol or $\beta$ -CD-cinnamaldehyde, respectively.                                                                                                                                           | [4]  |
|               | Chitosan NPs                                                                                            | D-limonene                                                                          | 89.4-92.3%               | In vivo                        | In vivo: activation of plant ( <i>Arabidopsis thaliana</i> ) immune response @ chitosan 250 $\mu\text{g}\cdot\text{mL}^{-1}$ and D-limonene 5 $\text{mg}\cdot\text{mL}^{-1}$ dose.                                                                                                     | [5]  |
|               | Mesoporous silica NPs                                                                                   | Eugenol (encapsulated) and $\text{Ag}^+$ (coordinated to polydopamine as a coating) | n.a.                     | In vitro, ex-situ, and in vivo | In vitro: 47.92% and 71.38% inhibition at 30 and 60 $\mu\text{g}\cdot\text{mL}^{-1}$ , respectively. Ex situ (detached tomato leaves): 72.59% and 82.63% at 60 and 120 $\mu\text{g}\cdot\text{mL}^{-1}$ , respectively. In vivo (potted tomato leaves): high protection at both doses. | [6]  |
|               | Casein NPs                                                                                              | Eugenol                                                                             | 67.1-90.4%               | In vitro and ex-situ           | In vitro: MIC = 40.2 $\mu\text{g}\cdot\text{mL}^{-1}$ of eugenol. Ex-situ (pear fruit): 23 and 45% disease incidence after 8 and 12 days, respectively.                                                                                                                                | [7]  |
|               | ZnO@OAm nanorod-based nanocapsules                                                                      | Geraniol                                                                            | 33-78%                   | In vitro and in vivo           | In vitro: $\text{EC}_{50}$ = 150 $\mu\text{g}\cdot\text{mL}^{-1}$ for 1:3 ZnO:geraniol ratio. In vivo (tomato and cucumber plants): disease index of 3 (vs. 6 for control) in cucumber and 4 (vs. 7 for control) in tomato after 96 h                                                  | [8]  |
|               | Chitosan-pea protein                                                                                    | EO from <i>Hyssopus officinalis</i>                                                 | n.a.                     | In vitro and ex situ           | In vitro: 85% inhibition at 2 $\text{mg}\cdot\text{mL}^{-1}$ . Ex-situ (strawberry fruits): 12.2% infection on day 8 at 2 $\text{mg}\cdot\text{mL}^{-1}$ ; 0.8 disease severity (vs. 4.3 for control) on day 9.                                                                        | [9]  |
|               | Chitosan NPs                                                                                            | EO from <i>Pistacia atlantica</i> hulls                                             | 43.3-61.5%               | In vitro and ex-situ           | In vitro: MIC = 20 $\mu\text{g}\cdot\text{mL}^{-1}$ . Ex-situ (strawberry fruits): 23.4% infection on the 10th day at 20 $\mu\text{g}\cdot\text{mL}^{-1}$ .                                                                                                                            | [10] |
|               | Poly (vinyl alcohol)/chitosan nanospheres                                                               | EO from <i>Salvia officinalis</i>                                                   | 66.1-73.3%               | In vitro                       | In vitro: MIC = 0.16-0.40 $\mu\text{L}\cdot\text{mL}^{-1}$ for 0.25%, 0.5%, and 1% v/v of sage EO                                                                                                                                                                                      | [11] |
|               | Chitosan                                                                                                | EO from <i>Zataria multiflora</i>                                                   | 3.2-45%                  | In vitro and ex-situ           | In vitro: MIC = 1500 $\mu\text{g}\cdot\text{mL}^{-1}$ . Ex-situ (strawberry fruits): 16.67% infection rate on day 9 at 1500 $\mu\text{g}\cdot\text{mL}^{-1}$ ; 1.5 disease severity (vs. 4.9 for control).                                                                             | [12] |
|               | Cyclodextrin-based nanosponges                                                                          | 1-methylcyclopropene *                                                              | n.a.                     | Ex-situ                        | Ex-situ (cut flowers): 40% inhibition at 0.25 $\mu\text{L}\cdot\text{L}^{-1}$ after 11 days.                                                                                                                                                                                           | [13] |
|               | Chitosan-gum arabic-coated liposomes                                                                    | 5I-1H-indole *                                                                      | 92%                      | In vitro and ex-situ           | In vitro: MIC = 25 $\mu\text{g}\cdot\text{mL}^{-1}$ . Ex-situ (strawberries, Kyoho Japanese grapes, and tangerines): high protection at 200 $\mu\text{g}\cdot\text{mL}^{-1}$ .                                                                                                         | [14] |
|               | ZIF-67 NPs                                                                                              | Boscalid *                                                                          | 18% loading ratio        | In vitro and in vivo           | In vitro: $\text{EC}_{90}$ = 17.6 $\mu\text{g}\cdot\text{mL}^{-1}$ . In vivo (citrus leaves): full inhibition at lower dose than non-encapsulated Boscalid.                                                                                                                            | [15] |

|                                                                         |                                                                                                                          |                                                                |                      |                      |                                                                                                                                                                                                                                                                                  |      |
|-------------------------------------------------------------------------|--------------------------------------------------------------------------------------------------------------------------|----------------------------------------------------------------|----------------------|----------------------|----------------------------------------------------------------------------------------------------------------------------------------------------------------------------------------------------------------------------------------------------------------------------------|------|
|                                                                         | Imidazolate framework-8                                                                                                  | Dazomet *                                                      | 4.4% loading content | In vitro and in vivo | In vitro: EC <sub>50</sub> = 7.9 µg·mL <sup>-1</sup> .<br>In vivo (potted cucumber leaves): 75% efficacy after 10 days, higher than that of dazomet (52%).                                                                                                                       | [16] |
| <i>B. cinerea</i> ,<br><i>S. sclerotiorum</i>                           | Fenhexamid and polyhexamethylene biguanide NPs                                                                           | Fenhexamid *                                                   | n.a.                 | In vitro and in vivo | In vitro: EC <sub>50</sub> = 3.26 and 0.18 µg·mL <sup>-1</sup> for <i>B. cinerea</i> and <i>S. sclerotiorum</i> , respectively.<br>In vivo (tomato and rape for <i>B. cinerea</i> and <i>S. sclerotiorum</i> , resp.): some protection in both cases at 1700 µg·mL <sup>-1</sup> | [17] |
| <i>C. capsici</i>                                                       | rGO-decorated Cu <sub>2-x</sub> Se NCs, coated with chitosan                                                             | Captan *                                                       | 36%                  | In vitro and in vivo | In vitro: EC <sub>50</sub> = 200 µg·mL <sup>-1</sup> at neutral pH.<br>In vivo (chili leaves): 25% disease incidence (vs. 55% for control) after 10 days                                                                                                                         | [18] |
| <i>C. gloeosporioides</i>                                               | Glucose oxidase-N-succinyl chitosan nanospheres                                                                          | Empty                                                          | -                    | In vitro and in vivo | In vitro: EC <sub>50</sub> = 211.2 µg·mL <sup>-1</sup> .<br>Ex-situ (mango fruits): high protection at 125 µg·mL <sup>-1</sup> for 7 days.                                                                                                                                       | [19] |
|                                                                         | Chitosan-agar                                                                                                            | EO from <i>Cymbopogon citratus</i>                             | 83%                  | In vitro and in vivo | In vitro: MIC = 1370 µg·mL <sup>-1</sup> .<br>In vivo (Topito chili plants): high protection for 30-40 EO (non-nano) capsules dosage.                                                                                                                                            | [20] |
|                                                                         | Polyvinyl alcohol nanofibers                                                                                             | EOs from <i>Thymus vulgaris</i> and <i>Piper betel</i>         | 40–76%               | In vitro and ex-situ | In vitro: ENF containing 300 µg·mL <sup>-1</sup> of blended EOs showed 24 mm inhibition zone on 6th day of incubation.<br>Ex-situ (sapota fruits): 40% disease incidence (vs. 100% for control).                                                                                 | [21] |
|                                                                         | Benzoylated lignin sulfonates-based NCs                                                                                  | Difenoconazole *                                               | n.a.                 | In vitro             | In vitro: EC <sub>50</sub> = 0.36 µg·mL <sup>-1</sup> ; 75% inhibition at 4 µg·mL <sup>-1</sup> .<br>In vivo (strawberry leaves): 82% inhibition after 14 days.                                                                                                                  | [22] |
| <i>C. gossypii</i>                                                      | Chitosan-lactide copolymer                                                                                               | Pyraclostrobin *                                               | 45-92%               | In vitro             | In vitro: 85.1% inhibition at 15 µg·mL <sup>-1</sup> .                                                                                                                                                                                                                           | [23] |
| <i>C. higginsianum</i>                                                  | Poly (lactic acid) microspheres                                                                                          | Azoxystrobin *                                                 | 78.5-92.7%           | In vitro             | In vitro: EC <sub>50</sub> = 2-21.3 µg·mL <sup>-1</sup> depending on microsphere size.                                                                                                                                                                                           | [24] |
| <i>C. nymphaeae</i>                                                     | Copper NPs                                                                                                               | EOs from <i>Thymus daenensis</i> and <i>Anethum graveolens</i> | n.a.                 | In vitro             | In vitro: EC <sub>50</sub> = 51.3 and 42.3 µg·mL <sup>-1</sup> for dill and thyme EOs encapsulated in Cu NPs, respectively.                                                                                                                                                      | [25] |
| <i>M. fructicola</i>                                                    | Zein casein NPs                                                                                                          | Natamycin *                                                    | 55-84%               | In vitro and ex-situ | In vitro: MIC = 80 µg·mL <sup>-1</sup> , similar to non-encapsulated natamycin.<br>Ex-situ (peach fruit): higher protection than non-encapsulated natamycin.                                                                                                                     | [26] |
| <i>P. citrinum</i>                                                      | <i>Azadirachta indica</i> oil nanoemulsion in Tween 20 and water                                                         | -                                                              | -                    | In vitro             | In vitro: 25 mm inhibition zone at 3% w/v, comparable to positive control.                                                                                                                                                                                                       | [27] |
| <i>P. fellutenum</i>                                                    | Chitosan                                                                                                                 | EO from <i>Cymbopogon nardus</i>                               | 46.7-81.6%           | In vitro             | In vitro: MIC = 0.16 µL·mL <sup>-1</sup> .                                                                                                                                                                                                                                       | [28] |
| <i>P. italicum</i> ,<br><i>P. chrysogenum</i> ,<br><i>P. spinulosum</i> | Chitosan nanomatrix                                                                                                      | EO from <i>Coriandrum sativum</i>                              | 26.5-78%             | In vitro             | In vitro: MICs not specified, but higher efficacy was attained for the encapsulated EO in all cases.                                                                                                                                                                             | [29] |
| <i>P. notatum</i>                                                       | Curcumin NPs                                                                                                             | -                                                              | -                    | In vitro             | In vitro: no activity (MIC > 1000 µg·mL <sup>-1</sup> )                                                                                                                                                                                                                          | [30] |
|                                                                         | Chitosan                                                                                                                 | EO from <i>Cymbopogon commutatus</i>                           | 19.8-44.8%           | In vitro             | In vitro: 56.5% inhibition at 5 mg·mL <sup>-1</sup> .                                                                                                                                                                                                                            | [31] |
| <i>P. chrysogenum</i>                                                   | Carbomer (Carbopol Aqua SF1) nanogels, with and without poly(diallyldimethylammonium chloride) surface functionalization | Zinc bis(dimethyldithiocarbamate) (Ziram) * and 3-iodo-2-      | -                    | In vitro             | In vitro: no inhibition for Ziram-loaded NCs; full inhibition for carbopol 0.1 wt% + IPBC 0.02-0.04 wt% when the NC suspensions were applied in the bulk and the surface of the growth media                                                                                     | [32] |

| propynyl-N-butylcarbamate (IPBC) *          |                                                                                                     |                                                          |                        |                            |                                                                                                                                                                                                            |      |
|---------------------------------------------|-----------------------------------------------------------------------------------------------------|----------------------------------------------------------|------------------------|----------------------------|------------------------------------------------------------------------------------------------------------------------------------------------------------------------------------------------------------|------|
| <i>P. digitatum</i> ,<br><i>P. italicum</i> | Mesoporous silica-chitosan NPs                                                                      | Prochloraz *                                             | 25.4%                  | In vivo<br>and ex<br>situ  | In vivo (citrus trees): 12.7% infection rate at 400 µg·mL <sup>-1</sup> (pre-harvest treatment).<br>Ex-situ (citrus fruit, postharvest treatment): disease severity = 3 after 10 days (vs. 5 for control). | [33] |
| <i>Penicillium</i> spp.                     | Rod-like hollow silica (hSiO <sub>2</sub> ) with tannic acid-Cu complexes capping                   | Dinotefuran *                                            | n.a.                   | In vitro                   | In vitro: 26.4 and 67.1% inhibition at 100 and 200 µg·mL <sup>-1</sup> , respectively.                                                                                                                     | [34] |
| <i>S. sclerotiorum</i>                      | Mesoporous selenium functionalized with trimethylammoniumpillar[5]arene and methyl orange           | Carbendazim *                                            | 23.5% loading rate     | In vitro<br>and in<br>vivo | In vitro: EC <sub>50</sub> = 0.41 µg·mL <sup>-1</sup> .<br>In vivo (oilseed rape plants): 30.64% lesion area (vs. full infection in control) after 72 h.                                                   | [35] |
|                                             | Disulfide-bridged mesoporous organosilica nanoparticles with calcium carbonate as the capping agent | Prochloraz *                                             | 8.9% loading ratio     | In vitro<br>and in<br>vivo | In vitro: EC <sub>50</sub> = 0.142 µg·mL <sup>-1</sup> .<br>In vivo (potted rapeseed plants): 36.1% efficacy after 7 days.                                                                                 | [36] |
|                                             | Starch-doped porous CaCO <sub>3</sub> with tannic acid-Cu complexes capping                         | Prochloraz *                                             | 15.2% loading capacity | In vitro<br>and in<br>vivo | In vitro: EC <sub>50</sub> = 0.144 µg·mL <sup>-1</sup> .<br>In vivo (potted oilseed rape leaves): 56.8% control effect after 7 days for 100 µg·mL <sup>-1</sup> .                                          | [37] |
|                                             | Hollow mesoporous silica with tannic acid-Cu as a capping agent                                     | Prochloraz *                                             | 17.7% loading          | In vitro                   | In vitro: EC <sub>50</sub> = 0.131 µg·mL <sup>-1</sup> ; 91.05% inhibition at 0.8 µg·mL <sup>-1</sup> .                                                                                                    | [38] |
|                                             | Phosphonium ionic liquid-porous hollow silica microcapsules coated with pectin                      | Prochloraz *                                             | 35.95%                 | In vitro<br>and in<br>vivo | In vitro: 97.9% control efficacy at 0.1 µg·mL <sup>-1</sup> of encapsulated PRO.<br>In vivo (rapeseed leaves): 97% efficacy after 9 days (vs. 5.8% for non-encapsulated PRO).                              | [39] |
|                                             | Zeolitic imidazolate framework-8 NPs                                                                | Prochloraz * + 2,4-dinitrobenzaldehyde (pH-jump reagent) | n.a.                   | In vitro<br>and in<br>vivo | In vitro: EC <sub>50</sub> = 0.122 µg·mL <sup>-1</sup> .<br>In vivo (oilseed rape plants): 51.2% efficacy after 14 days.                                                                                   | [40] |
|                                             | Graphene oxide                                                                                      | Pyraclostrobin *                                         | 87.04%                 | In vitro<br>and in<br>vivo | In vitro: 97% inhibition at 200 µg·mL <sup>-1</sup> .<br>In vivo (oilseed rape plants): 62.32% control efficacy at 200 µg·mL <sup>-1</sup> after 7 days.                                                   | [41] |

EC<sub>50</sub>: half maximal effective concentration; EO: essential oil; MIC: minimum inhibitory concentration; NC: nanocarrier; NP: nanoparticle; n.a.: no activity; \* Conventional fungicides.



## References (reference numbers do not match those that appear in the main document)

- Wang, C.-Y.; Lou, X.-Y.; Cai, Z.; Zhang, M.-Z.; Jia, C.; Qin, J.-C.; Yang, Y.-W. Supramolecular nanoplatform based on mesoporous silica nanocarriers and pillararene nanogates for fungus control. *ACS Applied Materials & Interfaces* **2021**, *13*, 32295-32306, doi:10.1021/acsami.1c08582.
- De Angelis, G.; Simonetti, G.; Chronopoulou, L.; Orekhova, A.; Badiali, C.; Petrucci, V.; Portoghesi, F.; D'Angeli, S.; Brasili, E.; Pasqua, G.; Palocci, C. A novel approach to control *Botrytis cinerea* fungal infections: uptake and biological activity of antifungals encapsulated in nanoparticle based vectors. *Sci. Rep.* **2022**, *12*, 7989, doi:10.1038/s41598-022-11533-w.
- Salgado, M.; Rodríguez-Rojo, S.; Alves-Santos, F.M.; Cocero, M.J. Encapsulation of resveratrol on lecithin and  $\beta$ -glucans to enhance its action against *Botrytis cinerea*. *J. Food Eng.* **2015**, *165*, 13-21, doi:10.1016/j.jfoodeng.2015.05.002.
- Canales, D.; Montoille, L.; Rivas, L.M.; Ortiz, J.A.; Yañez-S, M.; Rabagliati, F.M.; Ulloa, M.T.; Alvarez, E.; Zapata, P.A. Fungicides films of low-density polyethylene (LDPE)/inclusion complexes (carvacrol and cinnamaldehyde) against *Botrytis cinerea*. *Coatings* **2019**, *9*, 795, doi:10.3390/coatings9120795.
- Vega-Vásquez, P.; Mosier, N.S.; Irudayaraj, J. Nanovaccine for plants from organic waste: D-limonene-loaded chitosan nanocarriers protect plants against *Botrytis cinerea*. *ACS Sustainable Chemistry & Engineering* **2021**, *9*, 9903-9914, doi:10.1021/acssuschemeng.1c02818.
- Wang, C.Y.; Jia, C.; Zhang, M.Z.; Yang, S.; Qin, J.C.; Yang, Y.W. A lesion microenvironment-responsive fungicide nanoplatform for crop disease prevention and control. *Advanced Healthcare Materials* **2022**, *11*, 2102617, doi:10.1002/adhm.202102617.
- Xue, Y.; Zhou, S.; Fan, C.; Du, Q.; Jin, P. Enhanced antifungal activities of eugenol-entrapped casein nanoparticles against anthracnose in postharvest fruits. *Nanomaterials* **2019**, *9*, 1777, doi:10.3390/nano9121777.
- Tryfon, P.; Kamou, N.N.; Pavlou, A.; Mourdikoudis, S.; Menkissoglu-Spiroudi, U.; Dendrinou-Samara, C. Nanocapsules of ZnO nanorods and geraniol as a novel mean for the effective control of *Botrytis cinerea* in tomato and cucumber plants. *Plants* **2023**, *12*, 1074, doi:10.3390/plants12051074.
- Hadidi, M.; Motamedzadegan, A.; Jelyani, A.Z.; Khashadeh, S. Nanoencapsulation of hyssop essential oil in chitosan-pea protein isolate nano-complex. *LWT* **2021**, *144*, 111254, doi:10.1016/j.lwt.2021.111254.
- Hesami, G.; Darvishi, S.; Zarei, M.; Hadidi, M. Fabrication of chitosan nanoparticles incorporated with *Pistacia atlantica* subsp. *kurdica* hulls' essential oil as a potential antifungal preservative against strawberry grey mould. *Int. J. Food Sci. Technol.* **2021**, *56*, 4215-4223, doi:10.1111/ijfs.15110.
- Erarslan, A.; Karakas, C.Y.; Bozkurt, F.; Sagdic, O. Enhanced antifungal activity of electrosprayed poly (vinyl alcohol)/chitosan nanospheres loaded with sage essential oil on the viability of *Aspergillus niger* and *Botrytis cinerea*. *ChemistrySelect* **2023**, *8*, e202300296, doi:10.1002/slct.202300296.
- Mohammadi, A.; Hashemi, M.; Hosseini, S.M. Nanoencapsulation of *Zataria multiflora* essential oil preparation and characterization with enhanced antifungal activity for controlling *Botrytis cinerea*, the causal agent of gray mould disease. *Innovative Food Science & Emerging Technologies* **2015**, *28*, 73-80, doi:10.1016/j.ifset.2014.12.011.
- Seglie, L.; Spadaro, D.; Trotta, F.; Devecchi, M.; Gullino, M.L.; Scariot, V. Use of 1-methylcyclopropene in cyclodextrin-based nanospheres to control grey mould caused by *Botrytis cinerea* on *Dianthus caryophyllus* cut flowers. *Postharvest Biology and Technology* **2012**, *64*, 55-57, doi:10.1016/j.postharvbio.2011.09.014.
- Raj, V.; Raorane, C.J.; Lee, J.-H.; Lee, J. Appraisal of chitosan-gum arabic-coated bipolymeric nanocarriers for efficient dye removal and eradication of the plant pathogen *Botrytis cinerea*. *ACS Applied Materials & Interfaces* **2021**, *13*, 47354-47370, doi:10.1021/acsami.1c12617.
- Zhang, X.; Tang, X.; Zhao, C.; Yuan, Z.; Zhang, D.; Zhao, H.; Yang, N.; Guo, K.; He, Y.; Hu, J.; He, L.; He, L.; Qian, K. A pH-responsive MOF for site-specific delivery of fungicide to control citrus disease of *Botrytis cinerea*. *Chem. Eng. J.* **2022**, *431*, 133351, doi:10.1016/j.cej.2021.133351.
- Ren, L.; Zhao, J.; Li, W.; Li, Q.; Zhang, D.; Fang, W.; Yan, D.; Li, Y.; Wang, Q.; Jin, X.; Cao, A. Site-specific controlled-release imidazolate framework-8 for dazomet smart delivery to improve the effective utilization rate and reduce biotoxicity. *J. Agric. Food. Chem.* **2022**, *70*, 5993-6005, doi:10.1021/acs.jafc.2c00353.
- Tang, G.; Tian, Y.; Niu, J.; Tang, J.; Yang, J.; Gao, Y.; Chen, X.; Li, X.; Wang, H.; Cao, Y. Development of carrier-free self-assembled nanoparticles based on fenhexamid and polyhexamethylene biguanide for sustainable plant disease management. *Green Chemistry* **2021**, *23*, 2531-2540, doi:10.1039/d1gc00006c.

18. Sharma, S.; Singh, B.; Bindra, P.; Panneerselvam, P.; Dwivedi, N.; Senapati, A.; Adholeya, A.; Shanmugam, V. Triple-smart eco-friendly chili anthracnose control agro-nanocarrier. *ACS Applied Materials & Interfaces* **2021**, *13*, 9143-9155, doi:10.1021/acsami.0c18797.
19. Niu, X.; Lin, L.; Liu, L.; Wang, H. Preparation of a novel glucose oxidase-N-succinyl chitosan nanospheres and its antifungal mechanism of action against *Colletotrichum gloeosporioides*. *Int. J. Biol. Macromol.* **2023**, *228*, 681-691, doi:10.1016/j.ijbiomac.2022.12.171.
20. Tofiño-Rivera, A.P.; Castro-Amaris, G.; Casierra-Posada, F. Effectiveness of *Cymbopogon citratus* oil encapsulated in chitosan on *Colletotrichum gloeosporioides* isolated from *Capsicum annum*. *Molecules* **2020**, *25*, 4447, doi:10.3390/molecules25194447.
21. Gundewadi, G.; Rudra, S.G.; Gogoi, R.; Banerjee, T.; Singh, S.K.; Dhakate, S.; Gupta, A. Electrospun essential oil encapsulated nanofibers for the management of anthracnose disease in sapota. *Ind. Crops Prod.* **2021**, *170*, 113727, doi:10.1016/j.indcrop.2021.113727.
22. Liang, W.; Zhang, J.; Wurm, F.R.; Wang, R.; Cheng, J.; Xie, Z.; Li, X.; Zhao, J. Lignin-based non-crosslinked nanocarriers: A promising delivery system of pesticide for development of sustainable agriculture. *Int. J. Biol. Macromol.* **2022**, *220*, 472-481, doi:10.1016/j.ijbiomac.2022.08.103.
23. Xu, L.; Cao, L.-D.; Li, F.-M.; Wang, X.-J.; Huang, Q.-L. Utilization of chitosan-lactide copolymer nanoparticles as controlled release pesticide carrier for pyraclostrobin against *Colletotrichum gossypii* Southw. *J. Dispersion Sci. Technol.* **2014**, *35*, 544-550, doi:10.1080/01932691.2013.800455.
24. Yao, J.; Cui, B.; Zhao, X.; Zhi, H.; Zeng, Z.; Wang, Y.; Sun, C.; Liu, G.; Gao, J.; Cui, H. Antagonistic effect of azoxystrobin poly (lactic acid) microspheres with controllable particle size on *Colletotrichum higginsianum* Sacc. *Nanomaterials* **2018**, *8*, 857, doi:10.3390/nano8100857.
25. Weisany, W.; Samadi, S.; Amini, J.; Hossaini, S.; Yousefi, S.; Maggi, F. Enhancement of the antifungal activity of thyme and dill essential oils against *Colletotrichum nymphaeae* by nano-encapsulation with copper NPs. *Ind. Crops Prod.* **2019**, *132*, 213-225, doi:10.1016/j.indcrop.2019.02.031.
26. Xu, X.; Peng, X.; Huan, C.; Chen, J.; Meng, Y.; Fang, S. Development of natamycin-loaded zein-casein composite nanoparticles by a pH-driven method and application to postharvest fungal control on peach against *Monilinia fructicola*. *Food Chem.* **2023**, *404*, 134659, doi:10.1016/j.foodchem.2022.134659.
27. de Castro e Silva, P.; Pereira, L.A.S.; de Rezende, É.M.; dos Reis, M.V.; Lago, A.M.T.; Carvalho, G.R.; Paiva, R.; Oliveira, J.E.; Marconcini, J.M. Production and efficacy of neem nanoemulsion in the control of *Aspergillus flavus* and *Penicillium citrinum* in soybean seeds. *Eur. J. Plant Pathol.* **2019**, *155*, 1105-1116, doi:10.1007/s10658-019-01838-4.
28. Prasad, J.; Das, S.; Maurya, A.; Jain, S.K.; Dwivedy, A.K. Synthesis, characterization and in situ bioefficacy evaluation of *Cymbopogon nardus* essential oil impregnated chitosan nanoemulsion against fungal infestation and aflatoxin B1 contamination in food system. *Int. J. Biol. Macromol.* **2022**, *205*, 240-252, doi:10.1016/j.ijbiomac.2022.02.060.
29. Das, S.; Singh, V.K.; Dwivedy, A.K.; Chaudhari, A.K.; Upadhyay, N.; Singh, P.; Sharma, S.; Dubey, N.K. Encapsulation in chitosan-based nanomatrix as an efficient green technology to boost the antimicrobial, antioxidant and in situ efficacy of *Coriandrum sativum* essential oil. *Int. J. Biol. Macromol.* **2019**, *133*, 294-305, doi:10.1016/j.ijbiomac.2019.04.070.
30. Bhawana; Basniwal, R.K.; Buttar, H.S.; Jain, V.K.; Jain, N. Curcumin nanoparticles: Preparation, characterization, and antimicrobial study. *J. Agric. Food. Chem.* **2011**, *59*, 2056-2061, doi:10.1021/jf104402t.
31. Soltanzadeh, M.; Peighambaroust, S.H.; Ghanbarzadeh, B.; Mohammadi, M.; Lorenzo, J.M. Chitosan nanoparticles encapsulating lemongrass (*Cymbopogon commutatus*) essential oil: Physicochemical, structural, antimicrobial and in-vitro release properties. *Int. J. Biol. Macromol.* **2021**, *192*, 1084-1097, doi:10.1016/j.ijbiomac.2021.10.070.
32. Raimond, L.; Halbus, A.F.; Athab, Z.H.; Paunov, V.N. Antimould action of Ziram and IPBC loaded in functionalised nanogels against *Aspergillus niger* and *Penicillium chrysogenum*. *Materials Advances* **2022**, *3*, 8178-8192, doi:10.1039/d2ma00271j.
33. Liang, Y.; Fan, C.; Dong, H.; Zhang, W.; Tang, G.; Yang, J.; Jiang, N.; Cao, Y. Preparation of MSNs-chitosan@prochloraz nanoparticles for reducing toxicity and improving release properties of prochloraz. *ACS Sustainable Chemistry & Engineering* **2018**, *6*, 10211-10220, doi:10.1021/acssuschemeng.8b01511.
34. Hong, T.; Wan, M.; Lv, S.; Peng, L.; Zhao, Y. Metal-phenolic coated rod-like silica nanocarriers with pH responsiveness for pesticide delivery. *Colloids and Surfaces A: Physicochemical and Engineering Aspects* **2023**, *662*, 130989, doi:10.1016/j.colsurfa.2023.130989.
35. Huang, Y.; Yang, Y.; Liang, B.; Lu, S.; Yuan, X.; Jia, Z.; Liu, J.; Liu, Y. Green nanopesticide: pH-responsive eco-friendly pillar[5]arene-modified selenium nanoparticles for smart delivery of

- carbendazim to suppress *Sclerotinia* diseases. *ACS Applied Materials & Interfaces* **2023**, *15*, 16448-16459, doi:10.1021/acsami.2c23241.
36. Gao, Y.; Liang, Y.; Dong, H.; Niu, J.; Tang, J.; Yang, J.; Tang, G.; Zhou, Z.; Tang, R.; Shi, X.; Cao, Y. A bioresponsive system based on mesoporous organosilica nanoparticles for smart delivery of fungicide in response to pathogen presence. *ACS Sustainable Chemistry & Engineering* **2020**, *8*, 5716-5723, doi:10.1021/acssuschemeng.0c00649.
  37. Xiao, D.; Cheng, J.; Liang, W.; Sun, L.; Zhao, J. Metal-phenolic coated and prochloraz-loaded calcium carbonate carriers with pH responsiveness for environmentally-safe fungicide delivery. *Chem. Eng. J.* **2021**, *418*, 129274, doi:10.1016/j.cej.2021.129274.
  38. Shi, L.; Liang, Q.; Zang, Q.; Lv, Z.; Meng, X.; Feng, J. Construction of prochloraz-loaded hollow mesoporous silica nanoparticles coated with metal-phenolic networks for precise release and improved biosafety of pesticides. *Nanomaterials* **2022**, *12*, 2885, doi:10.3390/nano12162885.
  39. Yang, J.; Gao, Y.; Zhou, Z.; Tang, J.; Tang, G.; Niu, J.; Chen, X.; Tian, Y.; Li, Y.; Cao, Y. A simple and green preparation process for PRO@PIL-PHS-PEC microcapsules by using phosphonium ionic liquid as a multifunctional additive. *Chem. Eng. J.* **2021**, *424*, 130371, doi:10.1016/j.cej.2021.130371.
  40. Liang, W.; Xie, Z.; Cheng, J.; Xiao, D.; Xiong, Q.; Wang, Q.; Zhao, J.; Gui, W. A light-triggered pH-responsive metal-organic framework for smart delivery of fungicide to control *Sclerotinia* diseases of oilseed rape. *ACS Nano* **2021**, *15*, 6987-6997, doi:10.1021/acsnano.0c10877.
  41. Peng, F.; Wang, X.; Zhang, W.; Shi, X.; Cheng, C.; Hou, W.; Lin, X.; Xiao, X.; Li, J. Nanopesticide formulation from pyraclostrobin and graphene oxide as a nanocarrier and application in controlling plant fungal pathogens. *Nanomaterials* **2022**, *12*, 1112, doi:10.3390/nano12071112.
